# Supplementary material
Source: PubMed Central journal article supplement (PMC6686693)
Supplement: Supp_Fig1.pdf [file Supp_Fig1.pdf]

## Supplementary Data

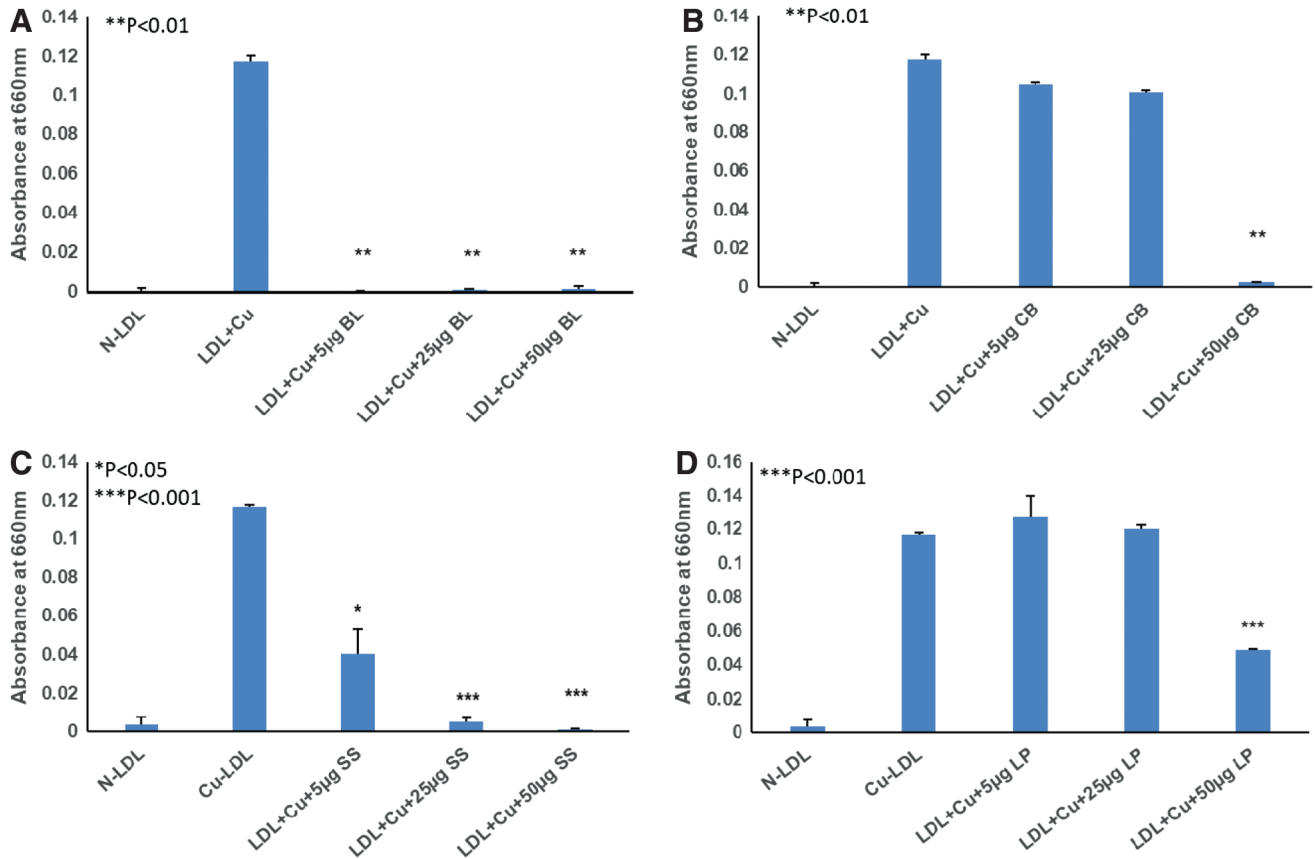

**SUPPLEMENTARY FIG. S1.** LMB test for Cu-oxidized LDL samples in the presence and absence of herbal aqueous extracts [(A) BL (B) CB (C) SS (D) LP]. LDL was isolated from the plasma of consenting subjects and used for oxidation with copper. One hundred micrograms of LDL oxidized with 5 µM copper in the presence and absence of increased concentrations of extracts (5–50 µg), in 1 mL PBS; formation of conjugated dienes was measured at 234 nm. After oxidation, the samples were used to determine peroxide substances. \**P*<0.05; \*\**P*<.01; \*\*\**P*<0.001. LDL, low-density lipoprotein; LMB, leucomethylene blue; PBS, phosphate-buffered saline.
