# Supplementary material
Source: PubMed Central journal article supplement (PMC6686693)
Supplement: Supp_Fig2.pdf [file Supp_Fig2.pdf]

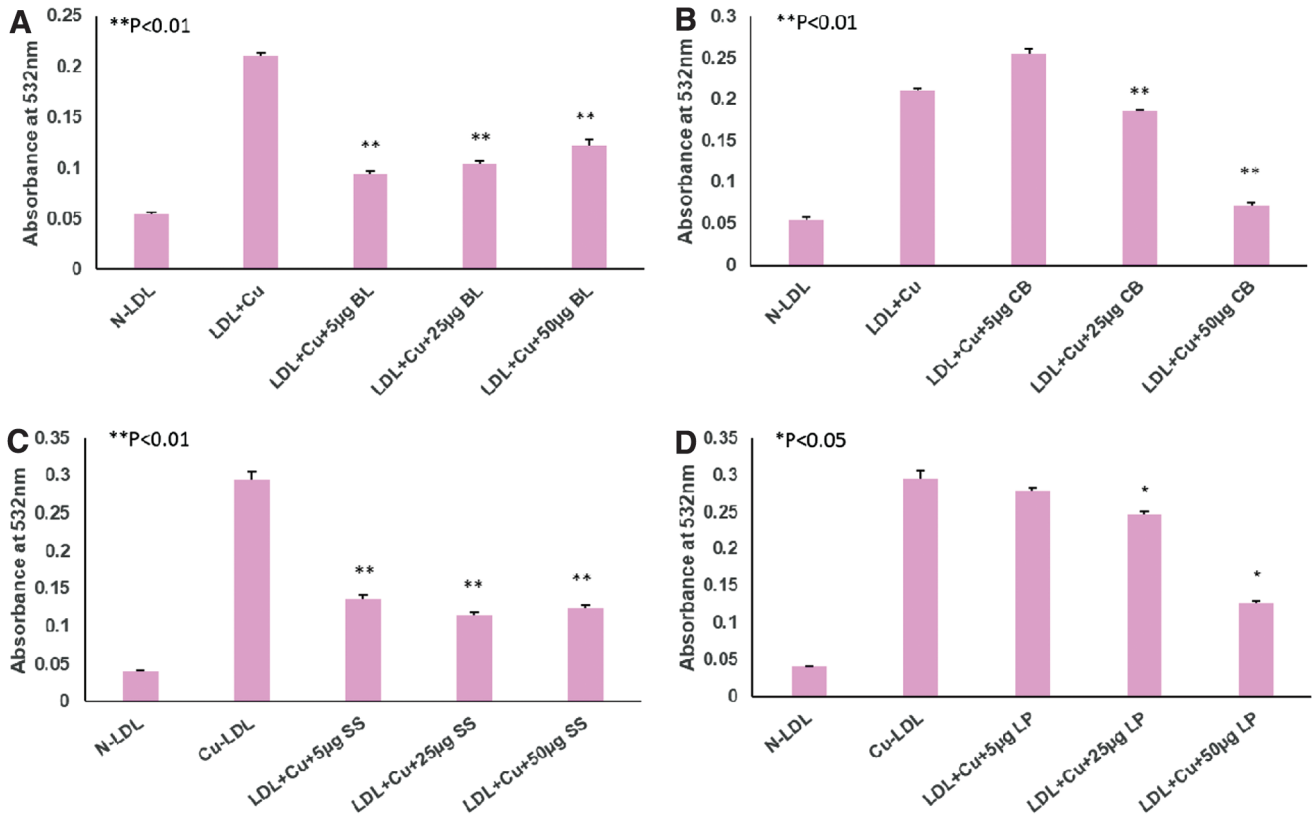

**SUPPLEMENTARY FIG. S2.** TBARS test for Cu-oxidized LDL samples in the presence and absence of herbal aqueous extracts [(A) BL (B) CB (C) SS (D) LP]. LDL was isolated from the plasma of consenting subjects and used for oxidation with copper. One hundred micrograms of LDL oxidized with 5 µM copper in the presence and absence of increased concentrations of extracts (5–50 µg), in 1 mL PBS; formation of conjugated dienes was measured at 234 nm. After oxidation, the samples were used to determine thiobarbituric acid substances. \* $P < 0.05$ ; \*\* $P < .01$ . TBARS, thiobarbituric acid reactive substances.
