# Supplementary material
Source: PubMed Central journal article supplement (PMC6686693)
Supplement: Supp_Fig3-Table1.pdf [file Supp_Fig3-Table1.pdf]

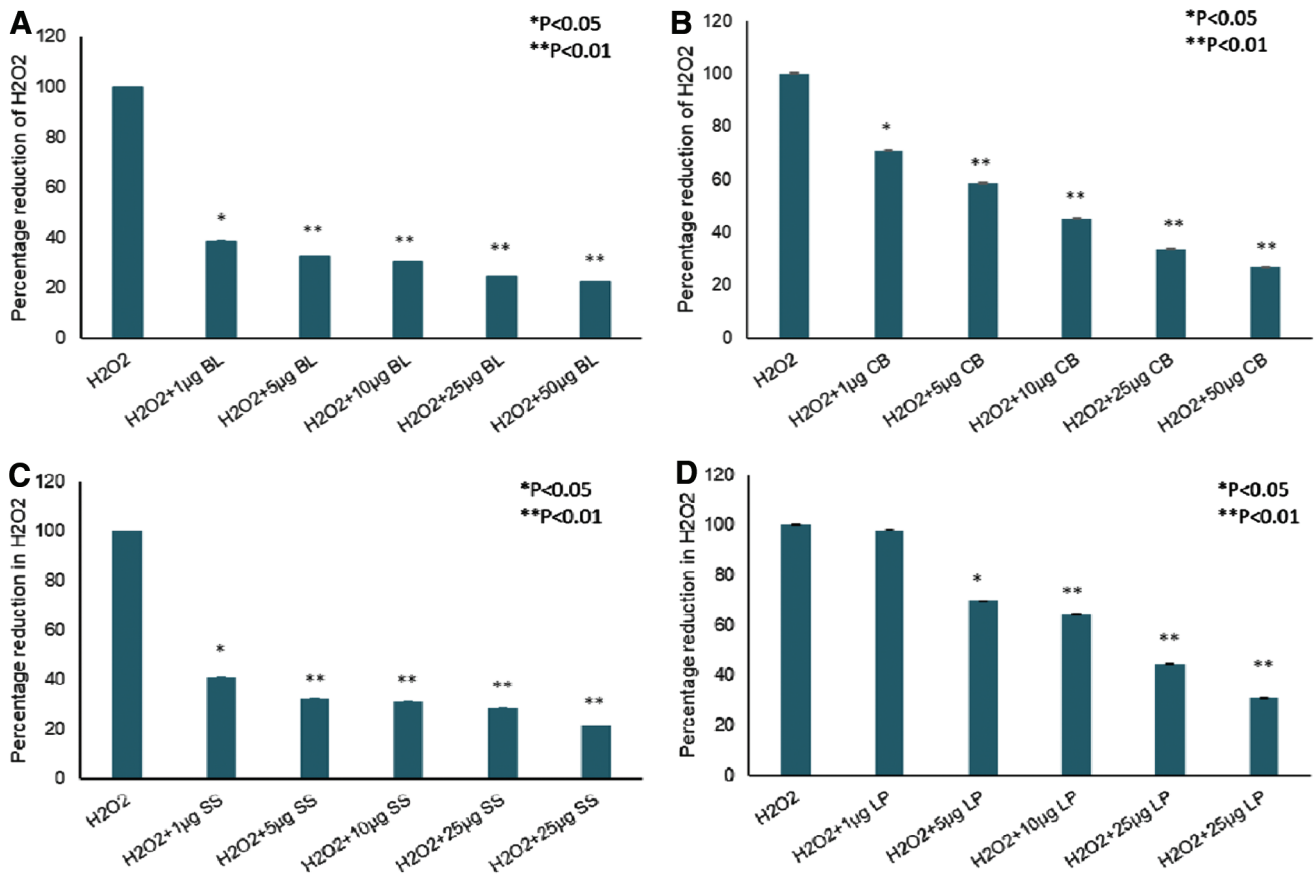

**SUPPLEMENTARY FIG. S3.** Herbal aqueous extracts in decomposition of H<sub>2</sub>O<sub>2</sub>: 200 nmoles/mL of H<sub>2</sub>O<sub>2</sub> was incubated with increasing concentrations of extracts (0–50 µg) of (A) BL (B) CB or (C) SS and (D) LP for 1 h at 37°C. Lipid peroxide present in the reaction system was analyzed by LMB assay. All the extracts showed significant reduction in the peroxide content in a concentration-dependent manner. \**P* < .05; \*\**P* < .01.

**SUPPLEMENTARY TABLE S1.** LIST OF OLIGONUCLEOTIDE PRIMERS USED FOR REAL TIME-POLYMERASE CHAIN REACTION

| Species | Target | Forward primer                   | Reverse primer              |
|---------|--------|----------------------------------|-----------------------------|
| Human   | GAPDH  | 5'-GGAACATGTA AACCATGTAGTTGAG-3' | 5'-AGTCAACGGATTTGGTCGTA-3'  |
|         | IL-1β  | 5'-CTTCGAGGCACAAGGCACAA-3'       | 5'-CCCTTGCTGTAGTGGTGGTC-3'  |
|         | TNF-α  | 5'-ATGAGCACTGAAAGCATGATCC-3'     | 5'-GAGGCTGATTAGAGAGAGGTC-3' |
